# Supplementary material for: Identification of a Distinct miRNA Regulatory Network in the Tumor Microenvironment of Transformed Mycosis Fungoides
Source: MDPI journal article supplement (doi:10.3390/cancers13225854), 2021-11-22
Supplement: s1 [file s1]

# Identification of A Distinct miRNA Regulatory Network in the Tumor Microenvironment of Transformed Mycosis Fungoides

Cosimo Di Raimondo, Zhen Han, Chingyu Su, Xiwei Wu, Hanjun Qin, James F. Sanchez, Yate-Ching Yuan, Xochi-quetzal Martinez, Farah Abdulla, Jasmine Zain, Chun-Wei Chen, Steven T. Rosen and Christiane Querfeld

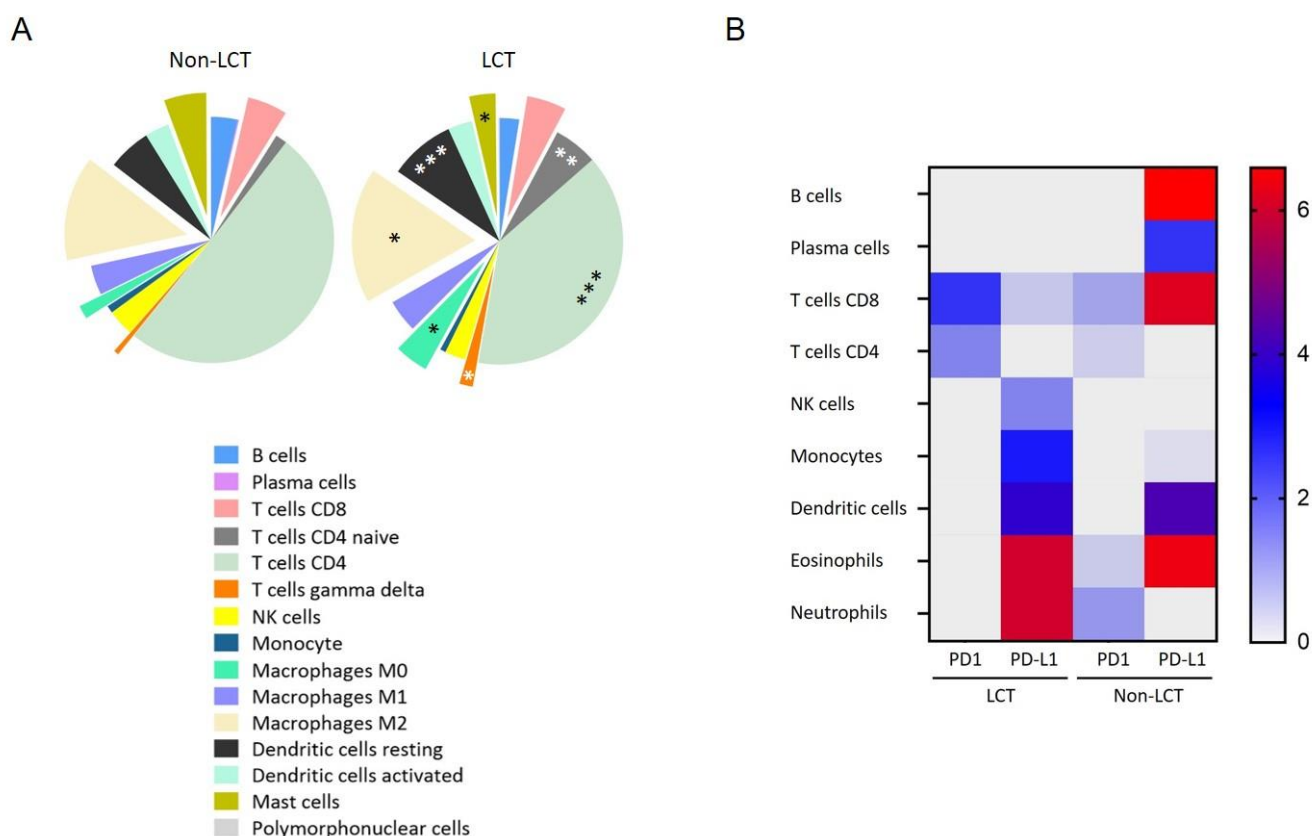

**Figure S1.** The distribution of various immune cell sub-types in LCT-MF and non-LCT. **A.** Profiling tumor infiltrating immune cells with CIBRSORT. *P* values < 0.05 were considered statistically significant. **B.** PD1 and PD-L1 expression on immune cells were profiled using CIBRSORT in the tumor microenvironment of MF-LCT and non-LCT.
